# Supplementary material for: MIF/CD74 axis is a target for novel therapies in colon carcinomatosis
Source: Springer Nature journal article supplement (doi:10.1186/s13046-016-0475-z), 2017-01-23
Supplement: MOESM1 [file 12014308]

**Supplementary Table 1: Antibodies for immunohistochemistry**

|           |                                                           |
|-----------|-----------------------------------------------------------|
| Claudin   | Thermo Fisher Scientific, Waltham, MA, USA                |
| CKA1-CKA3 | Agilent technologies, Dako Denmark A/S, Glostrup, Denmark |
| CK19      | Sigma-Aldrich, St Louis, USA                              |
| CK7       | Agilent technologies, Dako Denmark A/S, Glostrup, Denmark |
| CK20      | Agilent technologies, Dako Denmark A/S, Glostrup, Denmark |
| CDX2      | Agilent technologies, Dako Denmark A/S, Glostrup, Denmark |
| PAX8      | Proteintech Group, Inc. Rosemont, IL, USA                 |
| CD74      | Abcam, Inc, Cambridge UK                                  |
| MIF       | Abcam, Inc, Cambridge UK                                  |
| Mib1      | Agilent technologies, Dako Denmark A/S, Glostrup, Denmark |

## Supplementary Table 2: Antibodies for Western blot

|                                  |                                                  |
|----------------------------------|--------------------------------------------------|
| CD74                             | Abcam, Inc, Cambridge UK                         |
| MIF                              | Abcam, Inc, Cambridge UK                         |
| Phospho-JNK (Thr183/Y182)        | Cell Signaling Technology, Inc., Boston, MA, USA |
| AKT                              | Cell Signaling Technology, Inc., Boston, MA, USA |
| Phospho-AKT (Ser 473)            | Cell Signaling Technology, Inc., Boston, MA, USA |
| ERK 1/2                          | Sigma-Aldrich, St Louis, USA                     |
| Phospho-ERK ½<br>(Thr183/Tyr185) | Sigma-Aldrich, St Louis, USA                     |
| AMPK $\alpha$                    | Cell Signaling Technology, Inc., Boston, MA, USA |
| Phospho-AMPK $\alpha$ (Thr172)   | Cell Signaling Technology, Inc., Boston, MA, USA |
| mTOR                             | Cell Signaling Technology, Inc., Boston, MA, USA |
| Phospho-mTOR (Ser2448)           | Cell Signaling Technology, Inc., Boston, MA, USA |
| S6                               | Cell Signaling Technology, Inc., Boston, MA, USA |
| Phospho-S6 (Ser240/244)          | Cell Signaling Technology, Inc., Boston, MA, USA |
| 4E-BP1                           | Cell Signaling Technology, Inc., Boston, MA, USA |
| Phospho-4E-BP1 (Thr70)           | Cell Signaling Technology, Inc., Boston, MA, USA |
| Phospho-FOXO3a (Thr32)           | Cell Signaling Technology, Inc., Boston, MA, USA |
| SOD1                             | Sigma-Aldrich, St Louis, USA                     |
| HGMB1                            | Sigma-Aldrich, St Louis, USA                     |
| PPP1A                            | Abcam, Inc, Cambridge UK                         |

|                                                            |                                                  |
|------------------------------------------------------------|--------------------------------------------------|
| Phospho-PPP1A (Thr347)                                     | Abcam, Inc, Cambridge UK                         |
| PP2A                                                       | Abcam, Inc, Cambridge UK                         |
| Phospho-PP2A (Tyr307)                                      | Abcam, Inc, Cambridge UK                         |
| $\alpha$ -Phospho-Tyrosine                                 | Cell Signaling Technology, Inc., Boston, MA, USA |
| $\alpha$ -Phospho-Threonine                                | Cell Signaling Technology, Inc., Boston, MA, USA |
| P53                                                        | Cell Signaling Technology, Inc., Boston, MA, USA |
| P21                                                        | Cell Signaling Technology, Inc., Boston, MA, USA |
| P27                                                        | Cell Signaling Technology, Inc., Boston, MA, USA |
| Cyclin D1                                                  | Cell Signaling Technology, Inc., Boston, MA, USA |
| PARP cleaved                                               | Cell Signaling Technology, Inc., Boston, MA, USA |
| LC3B                                                       | Cell Signaling Technology, Inc., Boston, MA, USA |
| BAD                                                        | Cell Signaling Technology, Inc., Boston, MA, USA |
| Phospho-BAD (Ser112)                                       | Cell Signaling Technology, Inc., Boston, MA, USA |
| Bcl-2                                                      | Cell Signaling Technology, Inc., Boston, MA, USA |
| $\beta$ -Actin                                             | Sigma-Aldrich, St Louis, USA                     |
| $\beta$ -Tubulin                                           | Sigma-Aldrich, St Louis, USA                     |
| Vinculin                                                   | Sigma-Aldrich, St Louis, USA                     |
| Horseradish peroxidase (HRP)-<br>conjugated anti-mouse IgG | Bio-Rad (Mississauga, Ontario, Canada)           |
| HRP-conjugated anti-rabbit IgG                             | Bio-Rad (Mississauga, Ontario, Canada)           |

**Suplementary Table 3, page 1**    **Metabolic changes after 4-IPP or metformin treatments**

| ID | file             | Cell line    | Type                 | Characteristics                              | [ ] $\mu\text{g}/\mu\text{l}$ | mgprot/vol |
|----|------------------|--------------|----------------------|----------------------------------------------|-------------------------------|------------|
| A1 | carcinomatosis1  | C2-Organoids | Lysate (RIPA buffer) | Untreated (DMSO) 24h                         | 10,11                         | 2,022      |
| A2 | carcinomatosis2  | C2-Organoids | Lysate (RIPA buffer) | Untreated (DMSO) 24h                         | 9,48                          | 1,896      |
| A3 | carcinomatosis3  | C2-Organoids | Lysate (RIPA buffer) | Untreated (DMSO) 24h                         | 6,3                           | 1,26       |
| A4 | carcinomatosis4  | C2-Organoids | Lysate (RIPA buffer) | Untreated (DMSO) 24h                         | 9,58                          | 1,916      |
| A5 | carcinomatosis5  | C2-Organoids | Lysate (RIPA buffer) | Untreated (DMSO) 24h                         | 5                             | 1          |
| B1 | carcinomatosis6  | C2-Organoids | Lysate (RIPA buffer) | Metformin 5 mM 24h                           | 5,57                          | 1,114      |
| B2 | carcinomatosis7  | C2-Organoids | Lysate (RIPA buffer) | Metformin 5 mM 24h                           | 5,8                           | 1,16       |
| B3 | carcinomatosis8  | C2-Organoids | Lysate (RIPA buffer) | Metformin 5 mM 24h                           | 6,75                          | 1,35       |
| B4 | carcinomatosis9  | C2-Organoids | Lysate (RIPA buffer) | Metformin 5 mM 24h                           | 6,32                          | 1,264      |
| B5 | carcinomatosis10 | C2-Organoids | Lysate (RIPA buffer) | Metformin 5 mM 24h                           | 5,95                          | 1,19       |
| C1 | carcinomatosis11 | C2-Organoids | Lysate (RIPA buffer) | 4-IPP ( $\alpha$ -MIF) 100 $\mu\text{M}$ 24h | 2,53                          | 0,506      |
| C2 | carcinomatosis12 | C2-Organoids | Lysate (RIPA buffer) | 4-IPP ( $\alpha$ -MIF) 100 $\mu\text{M}$ 24h | 3,95                          | 0,79       |
| C3 | carcinomatosis13 | C2-Organoids | Lysate (RIPA buffer) | 4-IPP ( $\alpha$ -MIF) 100 $\mu\text{M}$ 24h | 2,42                          | 0,484      |
| C4 | carcinomatosis14 | C2-Organoids | Lysate (RIPA buffer) | 4-IPP ( $\alpha$ -MIF) 100 $\mu\text{M}$ 24h | 2,17                          | 0,434      |
| C5 | carcinomatosis15 | C2-Organoids | Lysate (RIPA buffer) | 4-IPP ( $\alpha$ -MIF) 100 $\mu\text{M}$ 24h | 3,17                          | 0,634      |

| Characteristics                              | cholesterol | lathosterol | desmosterol | lanosterol | 7aOHC | 7bOHC |
|----------------------------------------------|-------------|-------------|-------------|------------|-------|-------|
| Untreated (DMSO) 24h                         | 310,90      | 492,87      | 666,86      | 310,01     | 1,35  | 2,12  |
| Untreated (DMSO) 24h                         | 317,72      | 537,28      | 624,23      | 307,19     | 1,93  | 2,07  |
| Untreated (DMSO) 24h                         | 311,69      | 495,44      | 567,93      | 316,35     | 1,42  | 2,02  |
| Untreated (DMSO) 24h                         | 306,34      | 428,57      | 630,34      | 315,04     | 1,52  | 2,14  |
| Untreated (DMSO) 24h                         | 320,93      | 466,37      | 616,14      | 310,29     | 1,44  | 2,00  |
| Metformin 5 mM 24h                           | 183,46      | 266,03      | 351,35      | 220,69     | 1,47  | 2,17  |
| Metformin 5 mM 24h                           | 192,48      | 273,24      | 369,88      | 233,12     | 1,70  | 1,92  |
| Metformin 5 mM 24h                           | 199,83      | 254,58      | 422,91      | 241,29     | 1,77  | 1,90  |
| Metformin 5 mM 24h                           | 176,61      | 276,73      | 410,56      | 234,95     | 1,37  | 2,04  |
| Metformin 5 mM 24h                           | 194,98      | 226,09      | 388,62      | 194,06     | 1,42  | 2,11  |
| 4-IPP ( $\alpha$ -MIF) 100 $\mu\text{M}$ 24h | 328,36      | 421,59      | 534,10      | 268,83     | 1,16  | 1,27  |
| 4-IPP ( $\alpha$ -MIF) 100 $\mu\text{M}$ 24h | 303,01      | 389,42      | 548,27      | 239,66     | 1,25  | 1,25  |
| 4-IPP ( $\alpha$ -MIF) 100 $\mu\text{M}$ 24h | 316,53      | 404,19      | 578,54      | 267,75     | 1,08  | 1,12  |
| 4-IPP ( $\alpha$ -MIF) 100 $\mu\text{M}$ 24h | 323,30      | 436,20      | 553,44      | 266,23     | 1,75  | 1,45  |
| 4-IPP ( $\alpha$ -MIF) 100 $\mu\text{M}$ 24h | 310,77      | 426,74      | 522,93      | 270,15     | 1,56  | 1,37  |

**Suupplementary Table 3, page 2**

| <b>Characteristics</b>                 | <b>7KC</b> | <b>27OHC</b> | <b>C14:1</b> | <b>C14</b> | <b>C16:1A</b> |
|----------------------------------------|------------|--------------|--------------|------------|---------------|
| Untreated (DMSO) 24h                   | 2,42       | 15,30        | 668,07       | 2960,37    | 631,17        |
| Untreated (DMSO) 24h                   | 2,96       | 15,20        | 597,15       | 2924,05    | 619,98        |
| Untreated (DMSO) 24h                   | 3,17       | 12,26        | 349,57       | 1828,27    | 496,53        |
| Untreated (DMSO) 24h                   | 3,19       | 14,88        | 525,31       | 2508,57    | 494,88        |
| Untreated (DMSO) 24h                   | 2,72       | 13,41        | 249,12       | 1297,01    | 431,54        |
| Metformin 5 mM 24h                     | 3,59       | 8,47         | 368,31       | 1764,62    | 405,73        |
| Metformin 5 mM 24h                     | 3,28       | 8,90         | 347,95       | 1714,14    | 361,58        |
| Metformin 5 mM 24h                     | 3,32       | 11,83        | 414,21       | 2164,56    | 421,02        |
| Metformin 5 mM 24h                     | 3,14       | 12,36        | 357,03       | 1977,79    | 407,14        |
| Metformin 5 mM 24h                     | 3,42       | 9,49         | 337,44       | 1716,97    | 387,80        |
| 4-IPP ( $\alpha$ -MIF) 100 $\mu$ M 24h | 2,97       | 15,66        | 677,47       | 2596,00    | 574,64        |
| 4-IPP ( $\alpha$ -MIF) 100 $\mu$ M 24h | 2,42       | 14,83        | 953,56       | 3512,51    | 513,55        |
| 4-IPP ( $\alpha$ -MIF) 100 $\mu$ M 24h | 3,01       | 11,59        | 501,37       | 2223,28    | 561,82        |
| 4-IPP ( $\alpha$ -MIF) 100 $\mu$ M 24h | 2,61       | 13,76        | 472,73       | 1991,31    | 556,12        |
| 4-IPP ( $\alpha$ -MIF) 100 $\mu$ M 24h | 2,92       | 14,69        | 701,13       | 2753,62    | 632,09        |

| <b>Characteristics</b>                 | <b>C16:1B</b> | <b>C16</b> | <b>C18:1A</b> | <b>C18:1B</b> | <b>C18</b> |
|----------------------------------------|---------------|------------|---------------|---------------|------------|
| Untreated (DMSO) 24h                   | 62629,24      | 34928,12   | 77738,91      | 11327,57      | 27305,51   |
| Untreated (DMSO) 24h                   | 60934,29      | 32483,20   | 77033,89      | 12000,01      | 28097,90   |
| Untreated (DMSO) 24h                   | 38958,52      | 33467,24   | 71695,91      | 11236,41      | 25009,49   |
| Untreated (DMSO) 24h                   | 53709,23      | 32958,10   | 80596,86      | 11453,14      | 27063,59   |
| Untreated (DMSO) 24h                   | 27530,10      | 31974,36   | 71930,57      | 13050,64      | 25644,71   |
| Metformin 5 mM 24h                     | 34258,90      | 19826,23   | 50092,15      | 6481,53       | 16532,05   |
| Metformin 5 mM 24h                     | 36037,82      | 19717,26   | 49577,17      | 6202,27       | 16541,62   |
| Metformin 5 mM 24h                     | 38672,08      | 24186,78   | 51377,64      | 6352,32       | 18536,41   |
| Metformin 5 mM 24h                     | 33094,97      | 23940,66   | 59510,91      | 7574,91       | 18384,16   |
| Metformin 5 mM 24h                     | 33028,66      | 20051,28   | 51298,69      | 6945,06       | 16193,33   |
| 4-IPP ( $\alpha$ -MIF) 100 $\mu$ M 24h | 50079,43      | 19889,63   | 59829,31      | 7420,20       | 20927,04   |
| 4-IPP ( $\alpha$ -MIF) 100 $\mu$ M 24h | 37238,61      | 16175,61   | 56134,41      | 7461,97       | 19283,02   |
| 4-IPP ( $\alpha$ -MIF) 100 $\mu$ M 24h | 41317,78      | 21951,68   | 55420,22      | 7025,17       | 20784,09   |
| 4-IPP ( $\alpha$ -MIF) 100 $\mu$ M 24h | 42706,19      | 23121,01   | 56636,33      | 7017,04       | 21665,63   |
| 4-IPP ( $\alpha$ -MIF) 100 $\mu$ M 24h | 55241,93      | 19324,86   | 55312,36      | 7340,32       | 20387,46   |

**Suupplementary Table 3, pag 3**

| <b>Characteristics</b>                 | <b>lactate</b> | <b>piruvate</b> | <b>glicerol 3P</b> | <b>succinate</b> | <b>fumarate</b> | <b>malate</b> | <b>citrate</b> |
|----------------------------------------|----------------|-----------------|--------------------|------------------|-----------------|---------------|----------------|
| Untreated (DMSO) 24h                   | 3852,18        | 216,61          | 361,10             | 2506,33          | 406,01          | 908,53        | 586,46         |
| Untreated (DMSO) 24h                   | 3451,69        | 212,93          | 357,20             | 2202,30          | 365,99          | 819,17        | 438,60         |
| Untreated (DMSO) 24h                   | 3812,92        | 222,32          | 335,29             | 1900,77          | 348,41          | 855,15        | 581,49         |
| Untreated (DMSO) 24h                   | 3575,51        | 239,80          | 322,32             | 2055,85          | 372,61          | 959,64        | 454,45         |
| Untreated (DMSO) 24h                   | 3725,89        | 230,00          | 323,90             | 1926,57          | 378,29          | 855,45        | 546,87         |
| Metformin 5 mM 24h                     | 5747,40        | 207,56          | 420,97             | 565,07           | 300,93          | 666,10        | 147,95         |
| Metformin 5 mM 24h                     | 6292,29        | 191,27          | 419,22             | 552,84           | 279,78          | 674,66        | 135,45         |
| Metformin 5 mM 24h                     | 4543,52        | 191,26          | 435,49             | 659,09           | 311,94          | 652,22        | 157,45         |
| Metformin 5 mM 24h                     | 5086,87        | 225,24          | 453,99             | 641,60           | 319,59          | 593,86        | 185,19         |
| Metformin 5 mM 24h                     | 5553,04        | 214,18          | 456,87             | 607,31           | 267,40          | 562,26        | 168,30         |
| 4-IPP ( $\alpha$ -MIF) 100 $\mu$ M 24h | 3052,36        | 259,14          | 556,06             | 336,94           | 111,67          | 233,16        | 126,92         |
| 4-IPP ( $\alpha$ -MIF) 100 $\mu$ M 24h | 2614,66        | 240,14          | 603,31             | 306,00           | 119,30          | 272,54        | 127,98         |
| 4-IPP ( $\alpha$ -MIF) 100 $\mu$ M 24h | 4186,57        | 247,95          | 503,79             | 434,13           | 90,91           | 254,19        | 126,87         |
| 4-IPP ( $\alpha$ -MIF) 100 $\mu$ M 24h | 4225,18        | 234,52          | 568,87             | 353,03           | 82,85           | 254,05        | 119,70         |
| 4-IPP ( $\alpha$ -MIF) 100 $\mu$ M 24h | 3771,29        | 241,68          | 607,61             | 397,41           | 109,69          | 319,58        | 120,54         |

## Suupplementary Table 3, pag 4

|            | [ ] µg/µl | mgprot/vol | chol   | latho  | desmo  | lano   | 7aOHC  | 7bOHC | 7KC    | 27OHC |
|------------|-----------|------------|--------|--------|--------|--------|--------|-------|--------|-------|
| Mean unt   | 8,09      | 1,62       | 313,52 | 484,11 | 621,10 | 311,78 | 1,53   | 2,07  | 2,89   | 14,21 |
| SD unt     | 2,29      | 0,46       | 5,79   | 40,10  | 35,50  | 3,81   | 0,23   | 0,06  | 0,32   | 1,33  |
| CV% unt    | 28,30     | 28,30      | 1,85   | 8,28   | 5,72   | 1,22   | 15,13  | 3,00  | 11,19  | 9,37  |
| Mean met   | 6,08      | 1,22       | 189,47 | 259,33 | 388,66 | 224,82 | 1,55   | 2,03  | 3,35   | 10,21 |
| SD met     | 0,46      | 0,09       | 9,33   | 20,42  | 29,14  | 18,75  | 0,18   | 0,12  | 0,17   | 1,77  |
| CV% met    | 7,64      | 7,64       | 4,92   | 7,87   | 7,50   | 8,34   | 11,44  | 5,84  | 4,99   | 17,29 |
| Mean 4-IPP | 2,85      | 0,57       | 316,39 | 415,63 | 547,46 | 262,52 | 1,36   | 1,29  | 2,79   | 14,11 |
| SD 4-IPP   | 0,72      | 0,14       | 10,02  | 18,71  | 21,11  | 12,86  | 0,28   | 0,12  | 0,26   | 1,56  |
| CV% 4-IPP  | 25,21     | 25,21      | 3,17   | 4,50   | 3,86   | 4,90   | 20,90  | 9,64  | 9,23   | 11,06 |
| met/unt%   | 75,09     | 75,09      | 60,43  | 53,57  | 62,58  | 72,11  | 100,79 | 98,00 | 115,84 | 71,85 |
| 4-IPP/unt% | 35,19     | 35,19      | 100,92 | 85,85  | 88,14  | 84,20  | 88,61  | 62,31 | 96,38  | 99,28 |

| Date       | [ ] µg/µl | mgprot/vol | C14:1  | C14     | C16:1A | C16:1B   | C16      | C18:1A   | C18:1B   | C18      |
|------------|-----------|------------|--------|---------|--------|----------|----------|----------|----------|----------|
| Mean unt   | 8,09      | 1,62       | 477,85 | 2303,66 | 534,82 | 48752,27 | 33162,20 | 75799,23 | 11813,55 | 26624,24 |
| SD unt     | 2,29      | 0,46       | 174,24 | 724,13  | 86,98  | 15098,36 | 1131,94  | 3876,46  | 752,38   | 1264,49  |
| CV% unt    | 28,30     | 28,30      | 36,46  | 31,43   | 16,26  | 30,97    | 3,41     | 5,11     | 6,37     | 4,75     |
| Mean met   | 6,08      | 1,22       | 364,99 | 1867,62 | 396,66 | 35018,49 | 21544,44 | 52371,31 | 6711,22  | 17237,52 |
| SD met     | 0,46      | 0,09       | 29,77  | 198,22  | 22,88  | 2378,24  | 2304,57  | 4065,51  | 557,06   | 1126,30  |
| CV% met    | 7,64      | 7,64       | 8,16   | 10,61   | 5,77   | 6,79     | 10,70    | 7,76     | 8,30     | 6,53     |
| Mean 4-IPP | 2,85      | 0,57       | 661,25 | 2615,34 | 567,65 | 45316,79 | 20092,56 | 56666,53 | 7252,94  | 20609,45 |
| SD 4-IPP   | 0,72      | 0,14       | 192,62 | 584,71  | 42,70  | 7232,83  | 2673,99  | 1848,94  | 216,12   | 874,01   |
| CV% 4-IPP  | 25,21     | 25,21      | 29,13  | 22,36   | 7,52   | 15,96    | 13,31    | 3,26     | 2,98     | 4,24     |
| met/unt%   | 75,09     | 75,09      | 76,38  | 81,07   | 74,17  | 71,83    | 64,97    | 69,09    | 56,81    | 64,74    |
| 4-IPP/unt% | 35,19     | 35,19      | 138,38 | 113,53  | 106,14 | 92,95    | 60,59    | 74,76    | 61,40    | 77,41    |

|            | [ ] µg/µl | mgprot/vol | Lactate | Pyruvate | Glycerol 3P | Succinate | Fumarate | Malate | Citrate |
|------------|-----------|------------|---------|----------|-------------|-----------|----------|--------|---------|
| Mean unt   | 8,09      | 1,62       | 3683,64 | 224,33   | 339,96      | 2118,36   | 374,26   | 879,59 | 521,57  |
| SD unt     | 2,29      | 0,46       | 167,63  | 10,78    | 18,27       | 247,79    | 21,00    | 54,94  | 70,41   |
| CV% unt    | 28,30     | 28,30      | 4,55    | 4,81     | 5,37        | 11,70     | 5,61     | 6,25   | 13,50   |
| Mean met   | 6,08      | 1,22       | 5444,62 | 205,90   | 437,31      | 605,18    | 295,93   | 629,82 | 158,87  |
| SD met     | 0,46      | 0,09       | 663,69  | 14,78    | 17,74       | 46,33     | 21,88    | 49,21  | 19,05   |
| CV% met    | 7,64      | 7,64       | 12,19   | 7,18     | 4,06        | 7,66      | 7,40     | 7,81   | 11,99   |
| Mean 4-IPP | 2,85      | 0,57       | 3570,01 | 244,69   | 567,93      | 365,50    | 102,89   | 266,70 | 124,40  |
| SD 4-IPP   | 0,72      | 0,14       | 712,49  | 9,39     | 42,08       | 50,60     | 15,31    | 32,68  | 3,94    |
| CV% 4-IPP  | 25,21     | 25,21      | 19,96   | 3,84     | 7,41        | 13,84     | 14,88    | 12,25  | 3,17    |
| met/unt%   | 75,09     | 75,09      | 147,81  | 91,78    | 128,64      | 28,57     | 79,07    | 71,60  | 30,46   |
| 4-IPP/unt% | 35,19     | 35,19      | 96,92   | 109,07   | 167,06      | 17,25     | 27,49    | 30,32  | 23,85   |

### Suupplementary Table 3.

4-IPP and Metformin treatments produce metabolic changes.

The table shows the values of the metabolites analyzed after treatment of C2 organoids with 100 µM 4-IPP at and 5 mM metformin.

The results were expressed as ng/mg of proteins and were normalized to the value of total proteins present in each sample.

All the experiments were performed in triplicate.
